# Supplementary material for: A non-singlet oxygen mediated reaction photoinduced by phenalenone, a universal reference for singlet oxygen sensitization
Source: Royal Society of Chemistry journal article supplement (doi:10.1039/c3ra46867d), 2014-01-01
Supplement: c3ra46867d.pdf [file c3ra46867d.pdf]

### Electronic supplementary information (ESI)

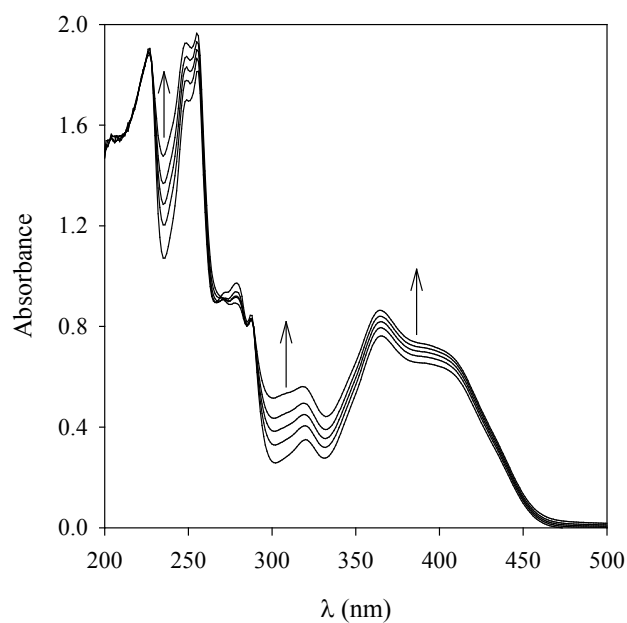

**Figure S1.** Time evolution of the absorption spectra of air-equilibrated solutions (pH 5.5) of Trp (100  $\mu\text{M}$ ) and PN ( $A(350 \text{ nm}) = 0.5$ ) exposed to UV-A irradiation. Spectra were recorded at 0, 1, 2, 3 and 5 min; optical pathlength 1 cm. Arrows indicate the changes observed at different wavelengths.
